# Supplementary material for: In vitro study for investigating the impact of decreasing the molecular weight of oat bran dietary fibre components on the behaviour in small and large intestine
Source: Royal Society of Chemistry journal article supplement (doi:10.1039/d0fo00367k), 2020-01-01
Supplement: d0fo00367k1.pdf [file d0fo00367k1.pdf]

Table S1. Reduction of bile acids at the end of *in vitro* duodenal incubation (120 min) by OBC samples (upper model - bile acid retention).

|                          | Mass of supernatant <sup>1</sup> (g) | Density of supernatant <sup>2</sup> (g/mL) | Volume of supernatant <sup>3</sup> (mL) | Bile acid concentration <sup>4</sup> (mmol/L) | Total bile acids in the supernatant <sup>5</sup> (μmol) | Total reduction of bile acids <sup>6</sup> (μmol) | Reduction of bile acids <sup>7</sup> (%) |
|--------------------------|--------------------------------------|--------------------------------------------|-----------------------------------------|-----------------------------------------------|---------------------------------------------------------|---------------------------------------------------|------------------------------------------|
| OBC Control <sup>‡</sup> | 9.41                                 | 1.01                                       | 9.36                                    | 5.11                                          | 47.81                                                   | 30.5                                              | 39.0                                     |
| Mix 1                    | 11.76                                | 1.02                                       | 11.57                                   | 4.86                                          | 56.21                                                   | 22.1                                              | 28.3                                     |
| Mix 5                    | 13.01                                | 1.02                                       | 12.74                                   | 4.59                                          | 58.48                                                   | 19.9                                              | 25.4                                     |
| Mix 50                   | 13.10                                | 1.02                                       | 12.84                                   | 4.69                                          | 60.23                                                   | 18.1                                              | 23.1                                     |
| Pure 1                   | 11.77                                | 1.02                                       | 11.60                                   | 5.00                                          | 57.96                                                   | 21.6                                              | 27.2                                     |
| Pure 5                   | 12.04                                | 1.01                                       | 11.91                                   | 5.24                                          | 62.39                                                   | 17.2                                              | 21.6                                     |
| Pure 50                  | 12.03                                | 1.01                                       | 11.87                                   | 4.77                                          | 56.61                                                   | 23.0                                              | 28.9                                     |
| Enzyme blank1*           | 15.33                                | 1.01                                       | 15.24                                   | 5.14                                          | 78.35                                                   | 0.0                                               | 0.0                                      |
| Enzyme blank2*           | 15.16                                | 1.00                                       | 15.12                                   | 5.27                                          | 79.60                                                   | 0.0                                               | 0.0                                      |

<sup>‡</sup>Control refers to the OBC treated under the same conditions but without any enzyme

\*Enzyme blank1 in series Control, Mix 1, Mix 5 and Mix 50; Enzyme blank2 in series Pure 1, Pure 5 and Pure 50.

<sup>1</sup>Mass of supernatant (g): the total amount of supernatant separated after centrifugation was weighted.

<sup>2</sup>Density of supernatant (g/mL) was measured by weighing the mass of 1 mL of the supernatant.

<sup>3</sup>Volume of supernatant (mL) was calculated as mass divided by density.

<sup>4</sup>Bile acid concentration (mmol/L) was determined in the supernatant using a kit of Total Bile Acid Assay.

<sup>5</sup>Total bile acids in the supernatant (μmol) was calculated as 'Bile acid concentration' multiplied by 'Volume'.

<sup>6</sup>Total reduction of bile acids (μmol) was calculated as the difference between 'Total bile acids' of the enzyme blank and sample.

<sup>7</sup>Reduction of bile acids (%) was calculated as the relation between the reduction of bile acid in the samples and their corresponding enzyme blank.

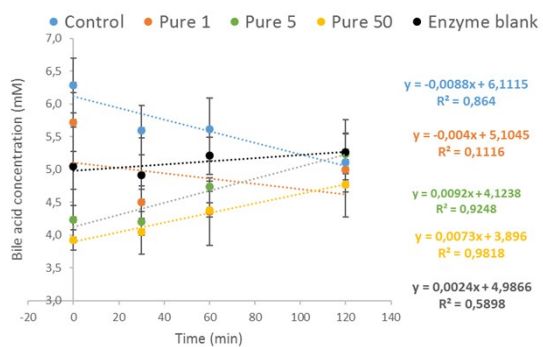

Figure S1. Changes in bile acid concentration (mM) in duodenal incubation *in vitro* in the presence of the OBC enzymatically treated with Pure enzyme (1, 5 or 50 nkat/g).

Equations of the trend lines are expressed as the same colours as the corresponding markers of the curve.

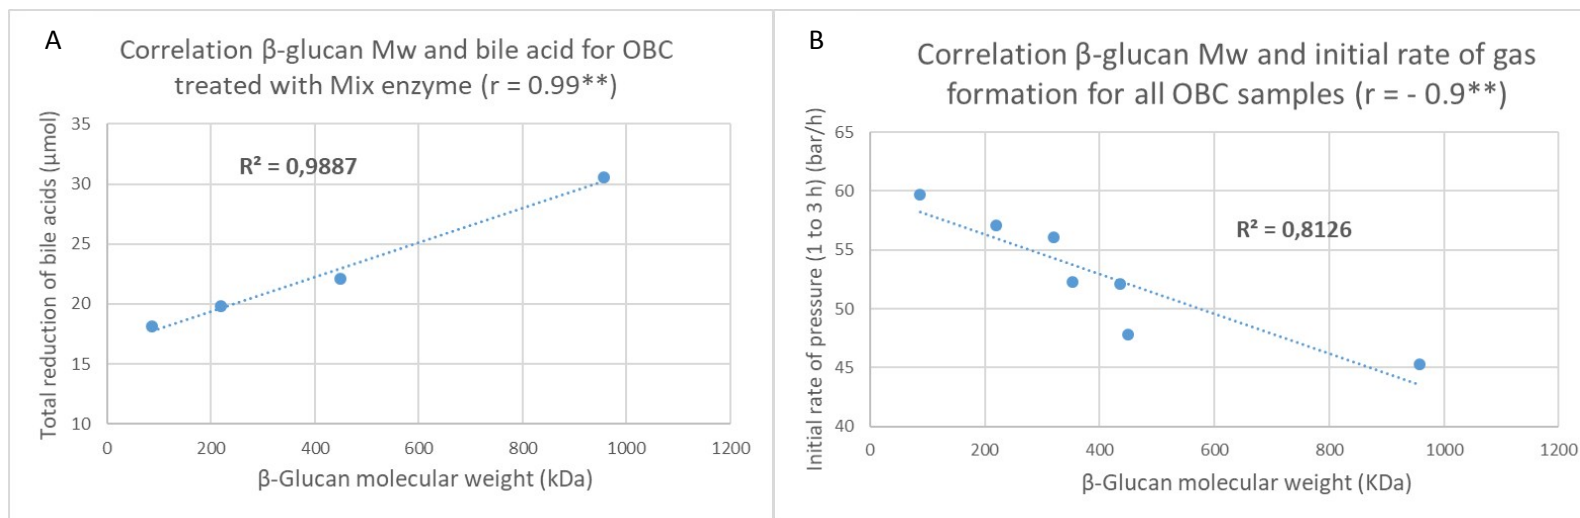

Figure S2. Correlations between the  $\beta$ -glucan molecular weight (Mw) of OBC samples and (A) total reduction of bile acids ( $\mu\text{mol}$ ) and (B) initial rate of gas formation.
